# Supplementary material for: Bushy sphere dendrites with husk-shaped branches axially spreading out from the core for photo-catalytic oxidation/remediation of toxins
Source: Royal Society of Chemistry journal article supplement (doi:10.1039/c7nr01092c), 2017-01-01
Supplement: c7nr01092c1.pdf [file c7nr01092c1.pdf]

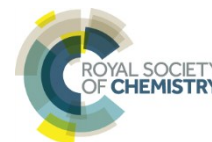

Journal Name

ARTICLE

## Bushy Sphere Dendrite with Husk-shaped Branches Axially Spreading out from Its Core for Photo-catalytic Oxidation/ Remediation of Toxins

Mohamed A. Shenashen,<sup>a</sup> Satoshi Kawada,<sup>a</sup> Mahmoud M. Selim,<sup>b</sup> Wafaa M. Morsy,<sup>a</sup> Hitoshi Yamaguchi,<sup>a</sup> Abdulaziz A. Alhamid,<sup>c,d</sup> Naoki Ohashi,<sup>e</sup> Izumi Ichinose,<sup>e</sup> and Sherif A. El-Safty<sup>a,f,\*</sup>

<sup>a</sup> National Institute for Materials Science (NIMS), Research Center for Strategic Materials, 1-2-1 Sengen, Tsukuba-shi, Ibaraki-ken, 305-0047, Japan.

<sup>b</sup> Department of Mathematics, Al-Aflaj College of Science and Human Studies, Prince Sattam Bin Abdulaziz University, Al-Aflaj 710-11912, Saudi Arabia

<sup>c</sup> Prince Sattam Bin Abdulaziz University, P. O. Box 173, Al-Kharj 11942, Saudi Arabia.

<sup>d</sup> Civil engineering department, College of Engineering, King Saud University, P.O. Box 800, Riyadh 11421, Saudi Arabia.

<sup>e</sup> Research Center for Functional Materials, National Institute for Materials Science, 1-1 Namiki, Tsukuba, Ibaraki, 305-0044, Japan.

<sup>f</sup> Graduate School of Advanced Science and Engineering, Waseda University, 3-4-1 Okubo, Shinjuku-Ku, Tokyo, 169-8555, Japan.

TEL: +81-29-859-2135; FAX: +81-29-859-2501

E-mail: [sherif.elsafty@nims.go.jp](mailto:sherif.elsafty@nims.go.jp); [sherif@aoni.waseda.jp](mailto:sherif@aoni.waseda.jp)

<http://www.nims.go.jp/waseda/en/labo.html>

### LSF and BSD Characterization analyses

The morphologies of the LSF and BSD samples were investigated via field emission scanning electron microscopy (FE-SEM, JEOL model 6500). The scanning electron microscope was operated at 15 keV in order to record better SEM micrographs.

A focused ion beam (FIB) system (JEM-9320FIB) operated at accelerating voltages from 5–30 kV with variable steps of 5 kV and magnification ranging from 150× to 300000×. The orientation axis (X and Y) of the powder samples containing LSF and BSD catalysts can be changed within  $\pm 1.2$  mm through a tilt angle of  $\pm 60^\circ$ . The samples were inserted inside the FIB machine using a bulk-sample holder ( $8 \times 8$  mm<sup>2</sup>) after deposition by a carbon protection layer. Before FIB investigation, the powder samples of the LSF and BSD catalysts were mixed with small amounts of epoxy (Gatan, Inc.) onto a small silicon wafer using a fine eyelash probe to form very thin films on the silicon substrate. Each thin film was baked on a hot plate at 130 °C for 10 min and subsequently coated with a uniformly thin carbon layer of about 30 nm. The samples were inserted into the FIB microscope operated at 30 kV and then roughly milled on both sides until a final thickness of 2  $\mu$ m using  $-1.5^\circ$  and  $+1.5^\circ$  tilts. Afterward, the LSF and BSD sample was cut and removed from the FIB system for subsequent HAADF–STEM microscopy. HAADF–STEM was employed to perform (i) TEM and (ii) STEM, (iii) EDS for elemental mapping, and (iv) electron diffraction (ED). The HAADF–STEM micrographs were recorded using a JEM-ARM200F-G instrument supplied with aberration correctors at the illumination and imaging lens systems to observe TEM/STEM images at high resolution. The HAADF–STEM microscope

was also equipped with a monochromated electron gun and supported by electron energy-loss spectroscopy at a high-energy resolution. Specifically, the cross-section specimens for HAADF–STEM was prepared by FIB system milling. The fine trapped probes typically sharpened the sample in the parallel direction of the longitudinal *c*-axis. The well-prepared FIB samples were attached to a silver grid by epoxy materials using a pick-up system. The LSF and BSD attached to the silver grid was inserted again into the FIB system to produce a 100 nm-thick layer. The sample was thinned from both sides by using alternate beams with variable intensity until the final thickness of 100 nm. The 100 nm sample was viewed under the HAADF–STEM microscope to record the cross-sectional images.

Wide-angle powder X-ray diffraction (XRD) patterns were measured using an 18 kW diffractometer (Bruker D8 Advance) with monochromatic Cu K $\alpha$  radiation. The sample measurement was repeated three times under rotation at various angles (15°, 30° and 45°). The diffraction data were analyzed using the DIFRAC plus Evaluation Package (EVA) software with the PDF-2 Release 2009 databases provided by Bruker AXS. The standard diffraction data were identified according to the databases of the International Centre for Diffraction Data (ICDD). For poor quality diffraction data, the TOPAS package program provided by Bruker AXS 2009 for profile and structure analysis was applied to integrate various types of X-ray diffraction analyses by supporting all profile fit methods currently employed in powder diffractometry.

X-ray photoelectron spectroscopy (XPS) analysis was conducted on a PHI Quantera SXM (ULVAC-PHI) instrument (Perkin–Elmer Co., USA) equipped with Al K $\alpha$  as an X-ray source for excitation (1.5 mm  $\times$  0.1 mm, 15 kV, 50 W) under a pressure of  $4 \times 10^{-8}$  Pa. A thin film of the sample was deposited on a Si slide before the start of analysis.

The textural surface properties of the LSF and BSD including the specific surface area and the pore structure were determined by N<sub>2</sub> adsorption–desorption isotherms which were measured using a BELSORP MIN-II analyzer (JP. BEL Co. Ltd) at 77 K. Prior to the N<sub>2</sub> adsorption/desorption process, the samples were pre-treated at 200 °C for 8 h under vacuum until the pressure was equilibrated to 10<sup>−3</sup> Torr. Specific surface area (*S*<sub>BET</sub>) was calculated using multi-point adsorption data from linear segment of the N<sub>2</sub> adsorption isotherms using Brunauer–Emmett–Teller (BET) theory. The pore size distribution was determined from the analysis of desorption branch of isotherm using the nonlocal density functional theory (NLDFT).

Thermogravimetric and differential thermal analyses (TG and DTA, respectively) were measured using a simultaneous DTA–TG Apparatus TG-60 (Shimadzu, Japan).

Raman spectroscopy (HR Micro Raman spectrometer, Horiba, Jobin Yvon) was conducted using an Ar ion laser at 633 nm. A CCD (charge coupled device) camera detection system and the LabSpec-3.01C software package were used for data acquisition and analysis, respectively. To ensure the accuracy and precision of the Raman spectra, 10 scans of 5 s from 300 cm<sup>−1</sup> to 1,600 cm<sup>−1</sup> were recorded.

The photo-oxidation, and -induced recovery processes of LSF and BSD were performed by using UV light and visible light sources (UV Lamp SLUV-6, T.HIROTA 100v, 50/60Hz, and  $\lambda$  of 254 and 365 nm) and (High pressure sodium (HPS) lamp, Philips Master SDW-T 100W, with wavelength range of 420–700 nm), respectively.

Energy Dispersive X-ray microanalysis (EDX-130S) was used to determine the elemental compositions of the LSF and BSD catalysts. The arsenite/arsenate anion concentrations were determined using a Perkin Elmer Elan-6000 ICP-MS.

Photo-electrochemical measurements were recorded by a Zennium/ZAHNER-Elektrok instrument controlled by Thales Z 2.0 software. The cell device was designated with a conventional three-electrode systems under front side illumination of UV light (190 nm to 400 nm) containing, Ag/AgCl (3 M NaCl) as reference electrode, Pt (platinum) wire as counter electrode and a working electrode, respectively. A constant potential of 0.5 V (vs. saturated Ag/ AgCl) was applied to measure transient photocurrent spectrum by using a mixture of 0.24 M Na<sub>2</sub>S and 0.35 M Na<sub>2</sub>SO<sub>3</sub> as an electrolyte. The cell device including the LSF and BSD catalysts was connected to an Avantes system of Ava-light-DHS deuterium-halogen light sources, which exhibit standard wide-range bands of deep UV deuterium (190 nm to 400 nm), deuterium lamp (215 nm to 400 nm), and halogen lamp (360 nm to 1500 nm). An Ava-Spec Avantes Fiber Optic spectrometer system (Avantes CIMPS-Abs-UV Ava-spec-2048x14) was used as a detector to determine the amplifying signal of the photocurrents.

DFT is a promising approach to effectively illustrate the electronic correlation effects. In this study, all calculations investigated by DFT were performed in accordance with the DMol3 of BIOVIA Dassault systems.<sup>[1,2]</sup> The exchange-correlation energy function was represented by the Perdew–Burke–Ernzerhof (PBE) formalism.<sup>[3]</sup> The Kohn–Sham equation was expanded in a double numeric quality basis set (DNP) with polarization functions. To consider the relativistic effect, the DFT Semi-core Pseudo-potentials<sup>[4]</sup> were used for the treatment of the core electrons of the doped clusters. The orbital cutoff range and Fermi smearing were selected as 5.0 Å and 0.001 Ha, respectively. The self-consistent-field (SCF) procedures were performed to obtain well-converged geometrical and electronic structures at a convergence criterion of 10<sup>-6</sup> a.u. The energy, maximum force, and maximum displacement convergence were set to 10<sup>-6</sup> Ha, 0.002 Ha/Å, and 0.005 Å, respectively. Meanwhile, the electrostatic site potential is a measure of the Coulomb interaction per unit charge experienced by an ion at a given position in space. DFT was also used to calculate the electrostatic potential (ESP) distribution. Modeling was performed to show a physical quantitative survey at each point on the isosurfaces using a feature of the surface-charging map. Typically, the isosurfaces of the electron densities were colored on the basis of ESP intensities (ESPI) using a lattice representation in which the charges are mapped on the cubic lattice in the so called contour where the ESP is calculated. The slab model was constructed with nine atomic layers of each catalyst. To compare the active center within the structure, oxygen atoms at the surface and subsurface layers were involved in the stoichiometric mode. EP was investigated over the range of -0.06 eV to +0.6 eV as shown in the optimized model.

#### Hierarchal structure stability and crystal morphology

The thermal stability of hierarchal morphology and crystal structures of microscopic-sphere dendrite particles was evident from thermogravimetry (TG)–differential thermal analysis (DTA) data and wide-angle powder X-ray diffraction (WA-XRD) profiles (Figures S1A, S1B). The BSD showed thermos-structural stability up to 500 °C, as revealed by TG/DTA analysis (Figure 3A). The WA-XRD profiles of the LSF and BSD (Figure S1B) show the characteristic diffraction peaks of face-centered cubic NiO crystals (JCPDS no. 01-089-5881) symmetry with the lattice constant  $a = 8.35 \text{ Å}$ . The high-temperature treatment leads to form well-dispersed 100 nm-poly-CN droplet-seeded bumps along microscopic-sphere dendrite particles, as shown from the formation of graphitic diffraction peak at  $2\theta/^\circ$  of 24.61. In addition, it represented well-resolved and distinctive diffraction peaks, respectively, with (111), (200), (220), (311) and (222) planes and  $d_{\text{spacing}} = 2.41, 2.09, 1.47, 1.26, \text{ and } 1.20 \text{ Å}$  associated with NiO (see WA-XRD profile, Figure S1B).<sup>[5]</sup>

Hierarchically microscopic-sphere BSD and LSF morphologies were developed with uniformly spaced inner pores of micro-meso- and macro-scale sizes (1.88-258 nm) (N<sub>2</sub> isotherms; Figure S1C, S1D). The heat-treatment of LSF and BSD moieties leads

to generate pore voids inside the core and shell due to dehydroxylation of  $\text{Ni}(\text{OH})_2$  and delocalization of poly-CN seeds. In addition, the specific surface area of the LSF and BSD catalysts are 82.3 and 80.4  $\text{m}^2/\text{g}$ , respectively. The  $\text{N}_2$  adsorption isotherms showed steepness with no hysteresis loop at relative pressure levels ( $P/P_0$ ) of 0.3 and 0.95, thereby indicating the formation of uniform mesopores and macropores.<sup>[6,7]</sup> These surface features enable the manipulate a multi-diffused and -accessible meso-, and macro-windows to enhance the molecular dynamic diffusion of  $\text{AsO}_3^{3-}$  species into converge  $\text{Ni}^{2+}$  surface along {110} crystal facet and to bind rapidly with interior active superoxide  $\text{NiOOH}$  sites during the photo-catalytic surface reaction.

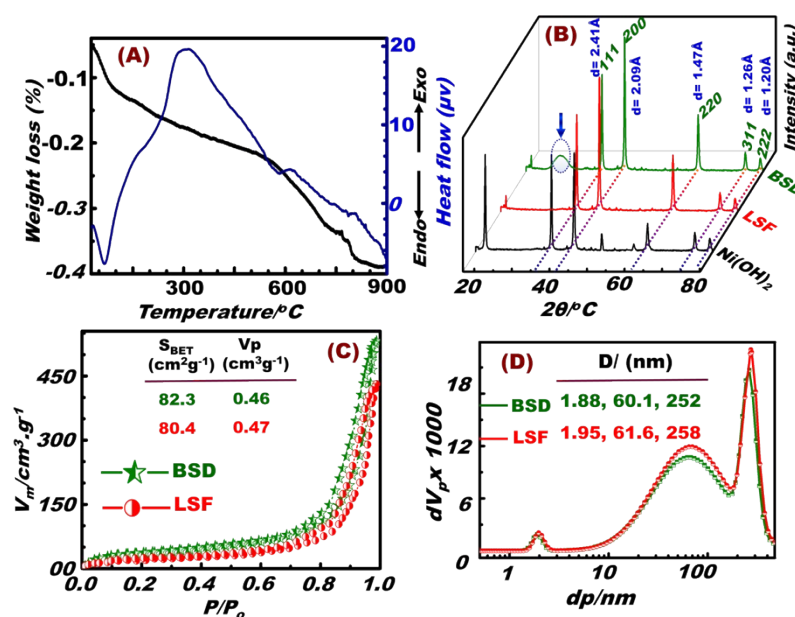

**Figure S1** (A) TG–DTA curves measured for the BSD revealing the thermal feature and stability of hierarchical structures. (B) WAXRD pattern of the as synthesized  $\text{Ni}(\text{OH})_2$  and calcined samples (LSF and BSD). (C) The  $\text{N}_2$  adsorption/desorption isotherms and (D) Pore size distribution analyzed by using NLDFT theory from the  $\text{N}_2$ - adsorption curves of LSF and BSD. (C & D insert) Textural features, including the specific surface area ( $S_{\text{BET}}$ ,  $\text{m}^2\text{g}^{-1}$ ), pore size ( $D$ , nm), and pore volume  $V_p$ ,  $\text{cm}^3\text{g}^{-1}$ ).

#### Surface features and components of hierarchical LSF and BSD structures

To elucidate the surface features and components of hierarchical BSD compare to LSF, we perform XPS measurements. Figure S2 shows wide range XPS spectra (i.e., survey) of LSF and BSD and components. In addition, high-resolution XPS spectra of the Ni 2p, O 1s, C 1s and N 1s peaks were shown in Figure S2 respectively. Figure S6-A shows the Ni 2p spectra with main peaks centered at 872.3 and 854.3 eV assigned to Ni 2p<sub>1</sub> and Ni 2p<sub>3</sub> of Ni (II) ions, respectively.<sup>[8]</sup> The peaks of Ni 2p and O 1s in the BSD undergo visible shifts to lower binding energy compared with pristine LSF (Figure S2 (B,C)). High resolution XPS spectra of the C 1s and N 1s peaks are shown in Figure S2 (D and E) to reveal the carbon source in hierarchical BSD. Figure S2-E shows the N1s spectra with four main peaks centered at 398.22, 399.14, 400.4 and 402.6 eV assigned to pyridinic nitrogen (C=N), pyrrolic nitrogen (C-N), graphitic nitrogen and N-oxide of pyridinic nitrogen, respectively. The C 1s spectra show strong peaks at 285.01, 285.8, 288.2 and 289.4 eV assigned to C-C (sp<sup>2</sup>), C-C (sp<sup>3</sup>), C=O and O-C=O bands, respectively, indicating the conversion of poly- adenine to N-doped carbon after carbonization.<sup>[9]</sup> The presence of pyridinic nitrogen results from the defects caused by N-doping may enable analyte to penetrate more rapidly and boost the shuttling of ions at the electrode-electrolyte interface.

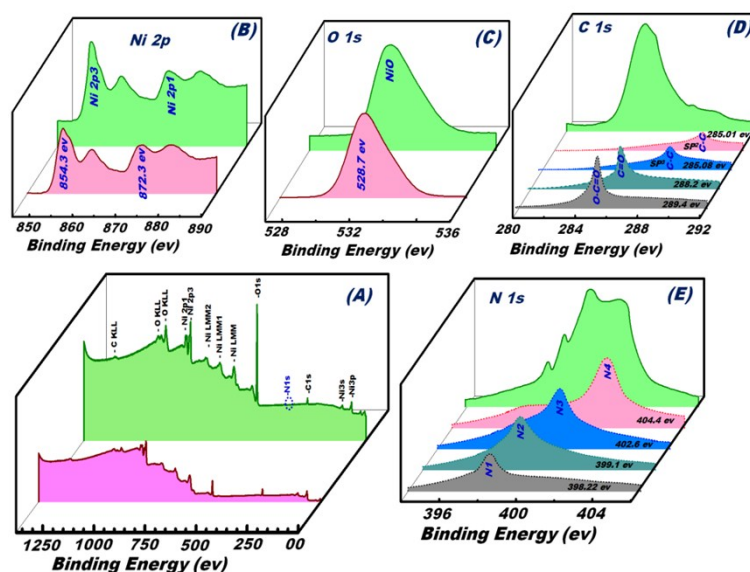

**Figure S2** (A) Complete survey of XPS spectrum of BSD, showing the existence of C1s and N 1s distinctive peaks. High resolution spectra of the Ni2p (B) and O1s peak (C) showing a binding energy shift because of LSF and C interaction. High resolution C1s scan (D) and N1s scan (E) deconvoluted into four influential peaks.

Raman spectra of the hierarchical dendrite LSF samples show several bands above  $400\text{ cm}^{-1}$  at the excitation wavelength of  $532\text{ nm}$  (Figure S3). The Raman spectra of the SH and SDH showed a vibrational band at approximately  $532\text{ cm}^{-1}$  caused by one phonon (1P) corresponding to the first-order transverse optical (TO) mode. The peaks of two phonons (2P) at approximately  $760$  and  $1085\text{ cm}^{-1}$  were attributed to 2TO modes and 2LO (longitudinal optical) modes respectively, indicating the presence of  $\text{NiO}^1$ . However, the existence of two distinct peaks in hierarchical BSD are corresponding to D ( $\sim 1350\text{ cm}^{-1}$ ) and G ( $\sim 1600\text{ cm}^{-1}$ ) bands originating from the disordered carbon and  $\text{sp}^2$  cluster, respectively.<sup>[10]</sup>

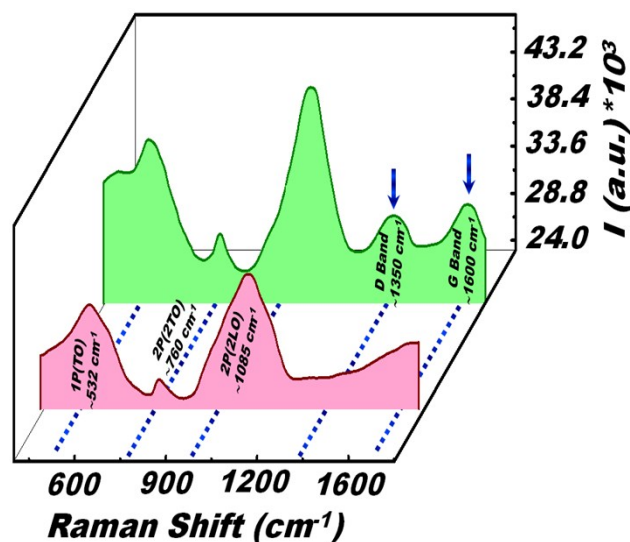

**Figure S3** Raman profiles of hierarchical LSF and BSD surfaces.

### The Photo-trapping of $\text{AsO}_3^{3-}$ species as a function of pH

The photo-trapping of  $\text{AsO}_3^{3-}$  ( $\text{As}^{\text{III}}$ ) anions as a function of pH was carried by using 200 mg of solid LSF and BSD catalysts and at [2 mg/L] initial concentration of  $\text{AsO}_3^{3-}$  species, and 20°C (Figure S4). The photo-trapping results showed that the trapping capacity efficiency of  $\text{AsO}_3^{3-}$  anions onto the LSF and BSD catalysts has slightly difference in the pH range 2-7.5. However, the maximum photo-trapping was obtained at pH 2. According the chemistry of arsenic species In aqueous solution, the arsenic species may be existed in two anionic forms  $\text{H}_2\text{AsO}_4^-$  and  $\text{HAsO}_4^{2-}$  form dominates at pH 2~11 range.<sup>3e</sup> The electrostatic interactions of the BSD and LSF surface with the negatively  $\text{H}_2\text{AsO}_4^-/\text{HAsO}_4^{2-}$  species is strongly expected (scheme 2). Our finding also indicates that the trapping capacity of  $\text{AsO}_3^{3-}$  anions using BSD and LSF catalysts was drastically decreased at higher pH values  $\gg 8.4$ .

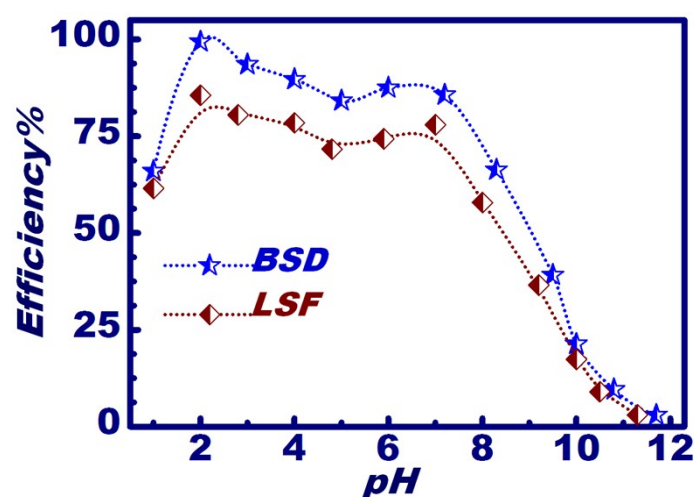

**Figure S4** The pH-dependent photo-trapping of  $\text{AsO}_3^{3-}$  anions as a function of pH at specific conditions of 200 mg of solid BSD and LSF catalysts and at [2 mg/L] initial concentration of  $\text{AsO}_3^{3-}$  species, and 20°C

### BSD structural stability under mechanical stirring

In this regard, the BSD structural stability under mechanical stirring as a function of pH solution changes was investigated (Figure S5). The pH solution in the range of 1.0-11.5 was adjusted by HCl and NaOH solutions. The batch-stirring experiment was carried out under simultaneously stirring of 0.5 g BSD dose, 100 ml volume at specific conditions of speed 400 rpm, stirring time 3 days, and 20 °C. After a period of time, the solution was filtrated using a vacuum pressure of 0.02 MPa and the released  $\text{Ni}^{2+}$  ions were verified by inductively coupled plasma mass spectrometry (ICP-MS). In general, Figure S5 shows evidence of the negligible releasing of  $\text{Ni}^{2+}$  ion concentration from BSD surfaces even after vigorously mechanical stirring for long period  $\geq 3$  days. The pH solution plays role in the control of the releasing amount of  $\text{Ni}^{2+}$  ions from BSD surface. At acidic pH solution  $< 5$ , the released amount in part-per-billion range 0.44-8.5 was determined; however, this amount drastically decreased to 0.1-0.3 in the pH range of 6.0- 12.0. Together, the ICP-MS analysis provided a clear evidence of retention of chemical structures, elemental composition, and binding along the hierarchal BSD matrices under pH-dependent mechanical stirring.

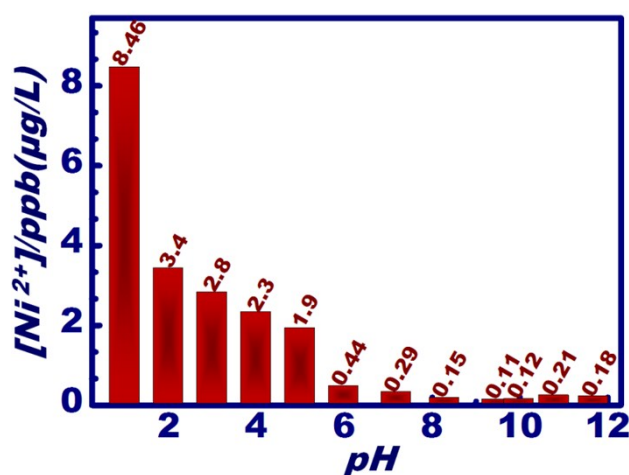

**Figure S5.** The releasing of  $\text{Ni}^{2+}$  ion concentration from BSD surface even after vigorously mechanical stirring for long period  $\geq 3$  days as a function of pH value, and at specific batch-stirring conditions of 0.5 g BSD, 100 ml volume at specific conditions of speed 400 rpm, and 20 °C. The released  $\text{Ni}^{2+}$  ions were verified by ICP-MS.

#### Effect of irradiation intensity of the photo-trapping tendency

The batch contact assay of the time-dependent trapping experiments of As(III)/As(V) species was carried out in aqueous solution by exposing under UV and UV-vis radiation at  $\lambda_{\text{max}}=365$  nm and  $\lambda_{\text{max}} \geq 420$  nm, respectively. The trapped As(V) species was analysed by using ICP-MS analysis under experimental conditions of As (V) [2 mg/L], 25 °C, 40 mg dose of BSD, and in 200 mL volume of aqueous solution. The quantitative analysis showed that >99% and 40% of As(V) species were trapped into BSD catalyst under UV and UV-vis radiation at  $\lambda_{\text{max}}=365$  nm and  $\lambda_{\text{max}} \geq 420$  nm, respectively. The finding indicates the effective trapping of As(V) under UV radiation region.

#### Photo-trapping (uptake) of $\text{AsO}_4^{3-}$ onto LSF and BSD surfaces

As shown in Figure S6 A, B, the uptake amount of (As<sup>III</sup>) ( $\text{AsO}_4^{3-}$ ) species was calculated based on the concentration changes ( $C_i - C_t$ ). Where the uptake% was calculated by using  $[100 \times (C_i - C_t)/C_i]$ , and the uptake capacity ( $q_t$  or  $q_e$  mg/g) was estimated by using  $[V \times (C_i - C_t)/m]$ . Where  $C_i$  and  $C_t$  are the concentration of the  $\text{AsO}_4^{3-}$  species at initial and conducted time “t”, respectively,  $q_e$  or  $q_t$  is the uptake capacity at equilibrium or at time t, respectively, V is the test solution volume in L, and m is the catalyst mass in g. It can be shown that the BSD has higher capacity compared with LSF catalyst.

The results indicated that under the optimum conditions of the photocatalytic process the presence of poly-CN accelerated the catalytic process and increasing the amount uptake ( $q_t$ , mg/g) of the target species Figure (4). It means that the C-N overstoichiometry surfaces played a key role in the enhancement of the photo-catalytic process. To investigate the photo-catalytic capability of BSD and LSF materials, the kinetic and thermodynamic properties were tasted Figure (S6 and S7). The kinetic properties were investigated using Langmuir isotherm as a model to test the equilibrium adsorption of the target species Figure (S6 and S7).<sup>[11, 12]</sup> The Langmuir isotherm of the  $\text{AsO}_4^{3-}$  photo-trapping capacity using LSF and BSD was calculated as follows:  $C_e/q_e = 1/K_L q_m + C_e/q_m$ , where  $q_m$  and  $K_L$  are the amounts trapped in relation to monolayer sorption capacity ( $\text{mg}\cdot\text{g}^{-1}$ ) and the Langmuir constant (L/mg), respectively (Figure S6C, D).



The linear form of Langmuir adsorption isotherm ( $C_e/q_e$  vs.  $C_e$ ) over the  $\text{AsO}_3^{3-}$  concentration range of 0.02–250 mg/L was investigated and shows the applicability of the Langmuir equation with high correlation coefficients ( $R^2$ ) 0.9995 to 0.9599 Figure (S6C).<sup>[13]</sup> The calculated  $q_m$  values were in agreement with the experimental values of  $\text{AsO}_3^{3-}$  species adsorption capacity at equilibrium, that were found 56.78 mg/g and 53.47 mg/g for BSD and LSF, respectively. In addition the  $K_L$  values indicate the nature trapping of the  $\text{AsO}_3^{3-}$  species into the BSD and LSF platforms.<sup>[14]</sup> The  $q_m$  and  $K_L$  values of the platform catalysts for the  $\text{AsO}_3^{3-}$  were calculated (Table S2). The Langmuir isothermal model was tested at different temperatures ranging from 20 °C to 40 °C Figures (S6D, and S7B). The results presented high efficiency toward the target species compared with other adsorbent (Table S4)

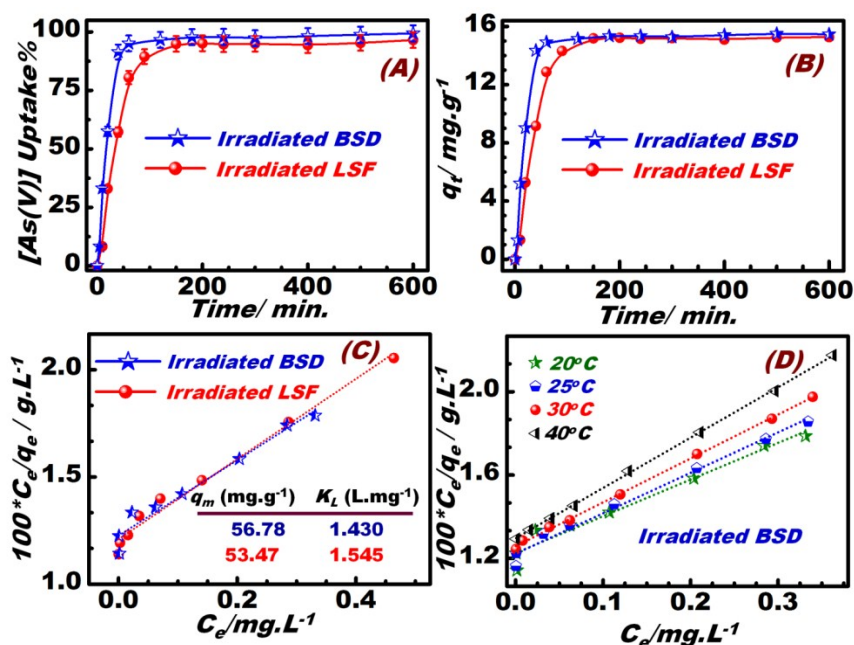

**Figure S6** (A, B) time-response of photo-induced activity of LSF and BSD catalysts during the photo-oxidation of As(III) ions in terms of uptake% (trapping) (A) and amount of trapping (B) of  $\text{AsO}_3^{3-}$  species from aqueous solution at specific conditions of 2 mg/L of [As(III)], catalyst dose 125 mg, solution volume (1L), and at 20°C, and under exposure of UV light irradiation at  $\lambda=365$  nm. (C, D) The linear form of the Langmuir plots of photo-catalytic/trapping of  $\text{AsO}_3^{3-}$  species as a function of catalysts type carried out at 20°C (C) and over the temperature range of 20–40°C (D), respectively, and under exposure of UV light irradiation at  $\lambda=365$  nm.

### Kinetic and thermodynamic studies of the trapping process during the oxidation reaction of $\text{AsO}_3^{3-}$ species

Moreover, the pseudo-first-order equation by Lagergren:  $[\ln(q_e - q_t) = \ln q_e - k_t t]$  was used to investigate the adsorption kinetic rates of the target ions. Results (Table S1 and Figure S7A) show evidence that the pseudo-first order kinetics was prescribed the photo-trapping process, as indicated from the values of the correlation coefficients ( $R^2$ ) in Table S1. The rate constant ( $k_t$ , min<sup>-1</sup>) and the equilibrium adsorption capacity ( $q_e$ , mg/g) for  $\text{AsO}_3^{3-}$  were estimated from the slopes and intercepts of the pseudo-linear first-order kinetic equation (Figure S7A). Moreover, the effects of different temperatures on the photo-trapping assay were determined (Figure S7B). The photo-trapping of As(V) species increases with increasing the temperature (Figure S7B). The finding indicates that the increase in the temperature may enhance the ability of As(V)-to-BSD interaction coverage.



Changes in thermodynamic parameters, including free energy ( $\Delta G^\circ$ ), enthalpy ( $\Delta H^\circ$ ), and standard entropy ( $\Delta S^\circ$ ), of the photo-oxidation/trapping process were estimated from the experiments performed at different temperatures by using the following equations:  $\Delta G^\circ = -RT \ln K_L$ , and  $\ln K_L = \Delta S^\circ/R - \Delta H^\circ/RT$ , where  $R$  is the universal gas constant (8.314 J/mol K),  $T$  is temperature (K), and  $K_L$  is the Langmuir constant. The Van't Hoff model was used to calculate the thermodynamic parameters for photocatalytic of the  $\text{AsO}_3^{3-}$  species on BSD and LSF materials at 20 °C - 40 °C, where the values of  $\Delta S^\circ$  and  $\Delta H^\circ$  were calculated from the slope and intercept, respectively, of the plot of  $\ln K_L$  versus  $1/T$  yields (Figure S7D and Table S3). The over-gaining of energy in the heterogeneous catalysts system might hinder the accessibility and molecular transport of arsenite ( $\text{AsO}_3^{3-}$ ) from the bulk solution into the interior layers.<sup>[15]</sup> The positive values of  $\Delta H^\circ$  and  $\Delta G^\circ$  indicate the endothermic nature and the extent of randomness along BSD solid/solution interfaces of  $\text{AsO}_3^{3-}$  species, respectively, Table S3.<sup>[13]</sup> Further, the negative values of  $\Delta G^\circ$  obtained in this study indicated the spontaneous nature of the photo-oxidation/trapping process and the physical trapping is the predominant mechanism in the sorption process.<sup>[16]</sup>

The surface properties of the BSD platform after photo-trapping process of  $\text{AsO}_3^{3-}$  species was investigated using  $\text{N}_2$  adsorption/desorption isotherms and elemental mapping, as shown in Figure S8. The  $\text{N}_2$  adsorption/desorption isotherms show the steepness without hysteresis loop at relative pressure levels ( $P/P_0$ ) of 0.3 and 0.95, indicating the formation of uniform meso- and macro-pores (Figure S8A). The results showed that the specific surface area and the pore size distribution were decreased after photo-trapping process of arsenic species. This finding indicates the arsenic species trapped into the interior pores of BSD catalyst platform. Moreover, the elemental mapping analysis of the BSD catalyst after photo-trapping process of  $\text{AsO}_3^{3-}$  species provides evidence of the presence of As ions trapped into the BSD catalyst (Figure S8B).

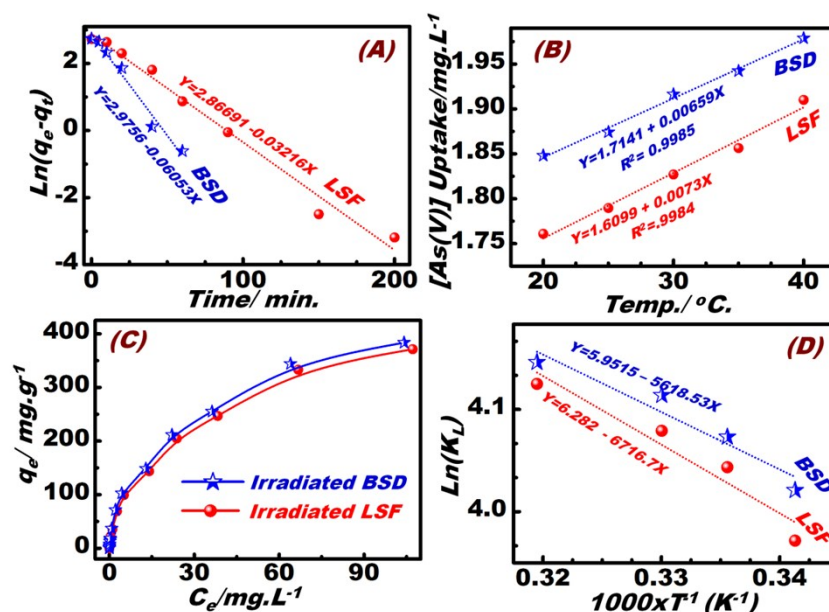

**Figure S7.** Determination of the integrated pseudo-first-order rate constant (A), temperature-dependent study (B), Langmuir adsorption isotherms (C) and the linear form of the van't Hoff plot of photo-induced activity of LSF and BSD catalysts (D) during the photo-oxidation of As(III) ions in aqueous solution. The photo-catalytic oxidation reactions were carried out at 20°C (A,C) and over the temperature range of 20–40°C (B, D), respectively,  $[2 \text{ mg.L}^{-1}]$  of  $\text{AsO}_3^{3-}$ , and catalyst amount of 125  $\text{mg.L}^{-1}$ , and under exposure of UV light irradiation at  $\lambda=365 \text{ nm}$ .

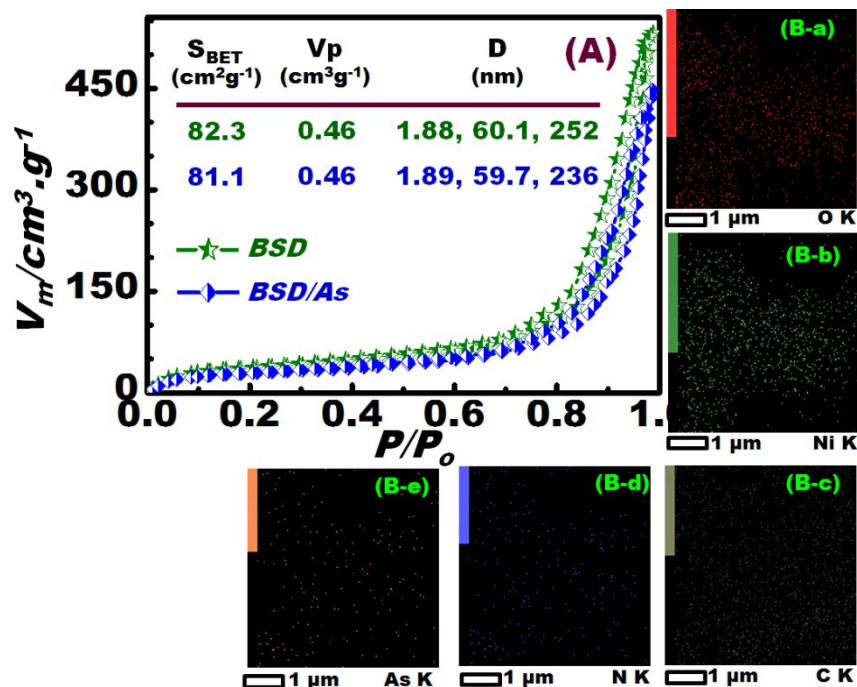

**Figure S8** (A) The  $N_2$  adsorption/desorption isotherms, (A insert) Textural features, including the specific surface area ( $S_{BET}$ ,  $m^2/g$ ), pore size ( $D$ , nm), pore volume ( $V_p$ ,  $cm^3 \cdot g^{-1}$ ), and (D) Pore size distribution of BSD and BSD with As(III). (B) Elemental mapping of BSD catalyst after capturing of As(III) species.

**Table S1:** The pseudo-first-order kinetics parameters of the photo-catalytic oxidation of  $AsO_3^{3-}$  species in aqueous water using LSF and BSD catalysts at specific conditions such as  $2 \text{ mg} \cdot L^{-1}$  of [As(III)], catalyst dose 125 mg, solution volume (1L), and at different temperatures and under exposure of UV light irradiation at  $\lambda=365 \text{ nm}$ .

| Catalysts | Temperature<br>$^{\circ}C$ | $R^2$  | $k_t$ ,<br>$\text{min}^{-1}$ | $q_e$ ,<br>$\text{mg/g}$ |
|-----------|----------------------------|--------|------------------------------|--------------------------|
| BSD       | 20                         | 0.9747 | 0.0605                       | 19.60                    |
| LSF       | 20                         | 0.9837 | 0.03216                      | 17.58                    |

**Table S2:** Langmuir isotherms of the trapping/capture of  $\text{AsO}_3^{3-}$  species into interior and exterior surface matrices, entrance meso-/micro-window sizes, and active {110} crystal site surfaces of LSF and BSD catalysts during the photo-catalytic oxidation of  $\text{AsO}_3^{3-}$  species in aqueous water at specific conditions such as catalyst dose 125 mg, solution volume (1L), and at different temperatures and under exposure of UV light irradiation at  $\lambda=365$  nm.

| Materials | Temperature<br>°C | $q_m$<br>mg/g | $K_L$<br>L/mg |
|-----------|-------------------|---------------|---------------|
| LSF       | 40                | 53.47         | 1.545         |
|           | 30                | 48.9          | 1.65          |
|           | 25                | 45.12         | 1.02          |
|           | 20                | 39.89         | 1.73          |
| BSD       | 40                | 56.78         | 1.43          |
|           | 30                | 51.51         | 1.587         |
|           | 25                | 47.48         | 0.878         |
|           | 20                | 41.41         | 1.86          |

**Table S3:** Thermodynamic parameters for  $\text{AsO}_3^{3-}$  ions on LSF and BSD catalysts during the photo-catalytic oxidation of  $\text{AsO}_3^{3-}$  species in aqueous water at specific conditions such as catalyst dose 125 mg, solution volume (1L), and at different temperatures and under exposure of UV light irradiation at  $\lambda=365$  nm.

| Materials | Temperature<br>(K) | $\Delta H^\circ$<br>(kJ/mol) | $\Delta S^\circ$<br>(J/mol.K) | $\Delta G^\circ$<br>(kJ/mol) |
|-----------|--------------------|------------------------------|-------------------------------|------------------------------|
| LSF       | 293                | 55.84                        | 52.22                         | -15.2446                     |
|           | 298                |                              |                               | -15.5057                     |
|           | 303                |                              |                               | -15.7668                     |
|           | 313                |                              |                               | -16.289                      |
| BSD       | 293                | 46.71                        | 49.48                         | -14.4509                     |

|  |     |  |          |
|--|-----|--|----------|
|  | 298 |  | -14.6983 |
|  | 303 |  | -14.9457 |
|  | 313 |  | -15.4405 |

**Table S4.** Comparison of the adsorption capacity of arsenic species ( $q_m/\text{mg}\cdot\text{g}^{-1}$ ) by LSF and BSD catalysts during the photo-oxidation of As(III) ions with some reported sorbent materials under specific experimental assays

| adsorbent                                                                 | $q_m / (\text{mg}\cdot\text{g}^{-1})$ | Ref. |
|---------------------------------------------------------------------------|---------------------------------------|------|
| Hematite                                                                  | 10.0                                  | 17)  |
| Iron(III)-loaded LDA                                                      | 62.9                                  | 18)  |
| Zr-LDA chelating resin                                                    | 88.7                                  | 19)  |
| Fe(III)-loaded cellulose                                                  | 18                                    | 20)  |
| Fe–Mn binary oxide                                                        | 119                                   | 21)  |
| Fe <sub>3</sub> O <sub>4</sub> –graphene oxide composite (M-GO)           | 42.9                                  | 22)  |
| Fe <sub>3</sub> O <sub>4</sub> -reduced graphene oxide composite (M-rGO), | 29.8                                  | 23)  |
| Zr(IV)-loaded orange waste                                                | 130                                   | 24)  |
| GN- $\alpha$ -FeOOH aerogel                                               | 13.42                                 | 25)  |
| Fe <sub>3</sub> O <sub>4</sub> :MnO <sub>2</sub>                          | 1.99-2.2                              | 26)  |
| Fe–Zr binary oxide                                                        | 120.0                                 | 27)  |
| Fe–Mn binary oxide                                                        | 132.7                                 | 28)  |
| Nano-Fe(III)–Ti(IV) mixed oxide                                           | 85.0                                  | 29)  |
| Nano-Fe(III)–Zr(IV) mixed oxide                                           | 64.5–66.5                             | 30)  |
| Nano-TiO <sub>2</sub>                                                     | 59.9                                  | 31)  |
| Al <sub>2</sub> O <sub>3</sub> /Fe(OH) <sub>3</sub>                       | 9.0                                   | 32)  |
| NZVI/AC                                                                   | 18.19                                 | 33)  |
| CuO nanoparticles                                                         | 26.9                                  | 34)  |
| TiO <sub>2</sub>                                                          | 5.52                                  | 35)  |
| Fe/TiO <sub>2</sub>                                                       | 6.17- 8.61                            | 36)  |
| Magnetite nanoparticles (MNPs)                                            | 15.88-17                              | 37)  |
| iron oxide multiwalled carbon nanotube (Fe-MWCNT) hybrid                  | 1.723                                 | 38)  |
| cotton-candy-like CuO                                                     | 12.9                                  | 39)  |
| CuO nanoparticles                                                         | 1.4                                   | 40)  |

|                                                      |        |               |
|------------------------------------------------------|--------|---------------|
| activated alumina                                    | 0.1803 | 41)           |
| Fe <sub>3</sub> O <sub>4</sub> -RGO-MnO <sub>2</sub> | 14.04  | 42)           |
| LSF                                                  | 53.47  | Current Study |
| BSD                                                  | 56.78  | Current Study |

### Reproducibility and Structure stability of catalysts under irradiation during multiple reuse/cycles

The reproducibility and Structure stability of BSD catalysts under irradiation during multiple reuse/cycles was investigated using the FE-SEM and EDX and elemental mapping of BSD catalyst after 20 times of continue irritation under the electron beams at  $\lambda=365$  nm during  $\text{AsO}_3^{3-}$  trapping/de-trapping (reuse/cycles) process (Figure S9). The FE-SEM cross-section micrograph results, the corresponding elemental mapping and EDX spectrum of {110}- BSD sphere catalyst represented clear evidence about the stability. In addition, the analysed values of atomic abundance of O, Ni, N, and C species that composed BSD catalyst attained their homogeneous distribution and composition after reuse cycles.

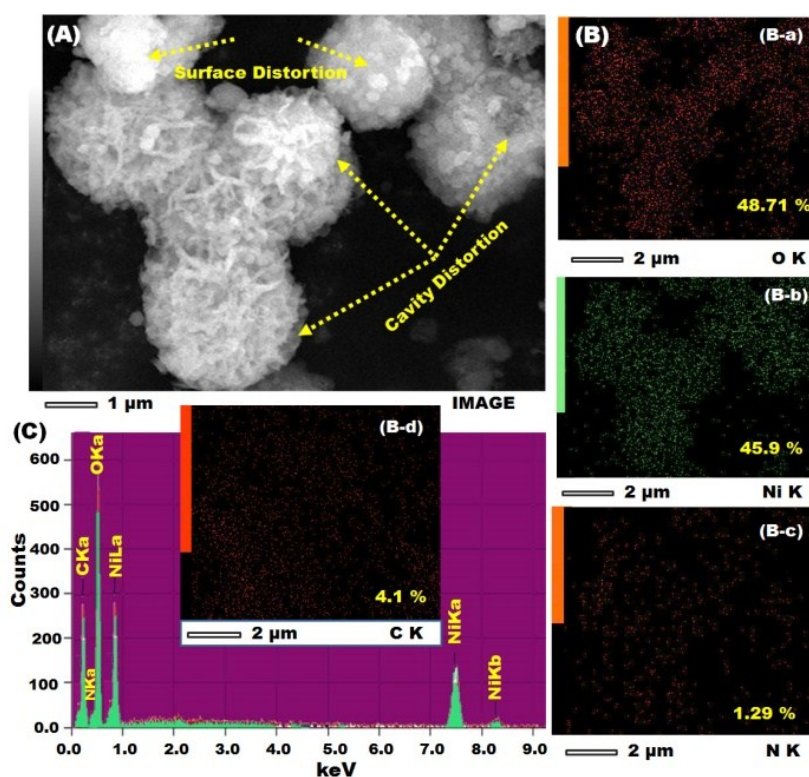

**Figure S9:** (A) Representative HFSEM cross-section micrograph, and the corresponding (B) elemental mapping and (C) EDX spectrum of {110}-BSD catalyst. Inserts (B) are the analysed values of atomic abundance of O, Ni, N, and C species that

composed BSD catalyst after 20 times of continue irritation during trapping/de-trapping (reuse/cycles) process under exposure of UV light at  $\lambda=365$  nm. The stability of internal structure, intense vases and caves covered the surface grooves, accumulated set composition of actively surface sites, and neatly branched tree-like chains are evident, despite the distortion in the mat-like tangle surface patterns (A-C).

### Mechanistic oxidation reaction of arsenic ( $\text{As}^{\text{III}}$ – $\text{As}^{\text{IV}}$ – $\text{As}^{\text{V}}$ ) species onto BSD catalysts

The arsenic species mainly existed in different active forms  $\text{AsO}_3^{3-}$ ,  $\text{HAsO}_3^-$ ,  $\text{HAsO}_4^{2-}$ ,  $\text{H}_2\text{AsO}_4^-$ , and  $\text{AsO}_4^{3-}$  in aqueous solution. The free –OH in the O-As-OH species (Figure 3) may enhance the electron surface movement and mobility, leading to the strong As(III)-to-BSD binding and high surface coverage around the actively electronic clouds or {110}- $\text{Ni}^{2+}$ -top-site surface during the reaction process (trapping). Under UV-light irradiation of {110}-BSD catalysts, several key steps may control the oxidation reaction sequences of ( $\text{As}^{\text{III}}$ – $\text{As}^{\text{IV}}$ – $\text{As}^{\text{V}}$ ) species (Scheme 2) as follows:

1. The formed VB  $\text{h}^+$  and hydroxyl  $\text{HO}^\cdot$  radical on VB-{110}-NiO crystal active sites have oxidation potential to oxidize the mono- or bi-dentate-O- surface interaction of  $\text{AsO}_3^{3-}$  ( $\text{As}^{\text{III}}$ ) reactant species to  $\text{HAsO}_3^-$  ( $\text{As}^{\text{IV}}$ ) anions and formation of active Ni-oxyhydroxide ( $\text{NiOOH}$ ) or Ni-hydroxide  $\text{Ni}(\text{OH})_2$  forms along {110} surface site plane formed on the designed catalyst surface.
2. The hydroxyl  $\text{HO}^\cdot$  radical of photo-induced product might oxidize the  $\text{HAsO}_3^-$  ( $\text{As}^{\text{IV}}$ ) bi-dentate-O-to- $\text{Ni}^{2+}$  surface and form a single monolayer  $\text{H}_2\text{AsO}_4^-$  ( $\text{As}^{\text{V}}$ ) species on the exposed CB-{110}- $\text{Ni}^{2+}$  site of super-O-O-hydroxide surfaces along both top and inter-layer crystals of BSD catalysts.
3. The actively formed  $\text{O}_2^-/\text{HO}_2^\cdot$  superoxide oxidants (active-CB  $\text{e}^-$ ) may lead to form a uniform assembly of  $\text{H}_2\text{AsO}_4^-$  ( $\text{As}^{\text{V}}$ ) mono-dentate-O-to- $\text{Ni}^{2+}$  site onto CB-{110}-Ni-OH surfaces through the oxidation of  $\text{HAsO}_4^{2-}$  ( $\text{As}^{\text{V}}$ ) bi-dentate-O-to- $\text{Ni}^{2+}$ -O-OH surfaces.

Figures 3 and 4 indicate that the key values of the homogenous distribution of 100 nm poly-CN bumps as sphere husk along the neat branches of BSD surface lead to the following:

1. Decrease in energy band gap of BSD (3.25 eV) and then prevention of the recombination of photo-generated  $\text{h}^+/\text{e}^-$  in the valence and conductance bands (VB, and CB, respectively),
2. Facilitation of the effective charge separation and interfacial electron transfer into the coverage surfaces,
3. Boost of the facile and simultaneous photons to produce reactive VB  $\text{h}^+/\text{HO}^\cdot$  radical and  $\text{O}_2^-/\text{HO}_2^\cdot$  superoxide oxidants,
4. Influenced excited states energy levels by minimizing the high surface energy and binding/trapping energies of {110}-NiO surface facet, and
5. Enhancement of the number of surface dangling bonds and facilitation of the interaction of arsenic reactant species.

Scheme 2 shows that the photo-detraping process onto BSD leads to the creation of a system for toxic waste management of extremely toxic arsenic ( $\text{As}^{\text{III}}$ – $\text{As}^{\text{IV}}$ – $\text{As}^{\text{V}}$ ) species through ecofriendly control process, reduced volume of solid-waste BSD catalysts due to the reusability, and water-free toxicants even at low level of contraction.

### Selective photo-removal of $\text{AsO}_3^{3-}$ species under visible light

**Table 1** Selective photo-removal of  $\text{AsO}_3^{3-}$  species under visible light from real water samples (tap, lake and underground waters) using BSD catalyst/trapper. The samples were spiked with different  $\text{AsO}_3^{3-}$  concentrations 20 and 200  $\mu\text{g/L}$  with a constant BSD dosage of 2 g/L, contact time 12 hr, and at 20 °C.

| As(III) spiked<br>$\mu\text{g/L}$ | Ground water                                                                                                                                                                                                                                                                                                                                                                                                                                                                                                                                                                                                                                                                                                                                                                              |             |          |
|-----------------------------------|-------------------------------------------------------------------------------------------------------------------------------------------------------------------------------------------------------------------------------------------------------------------------------------------------------------------------------------------------------------------------------------------------------------------------------------------------------------------------------------------------------------------------------------------------------------------------------------------------------------------------------------------------------------------------------------------------------------------------------------------------------------------------------------------|-------------|----------|
|                                   | Mg <sup>+2</sup> : 5.975; Ca <sup>+2</sup> : 19.005; Na <sup>+</sup> : 20.520; K <sup>+</sup> : 8.597; Li <sup>+</sup> : 0.035; Sr <sup>+2</sup> : 0.014; Cd <sup>+2</sup> : 0.007; Zn <sup>+2</sup> : 0.001; Pb <sup>+2</sup> : 0.005; Fe <sup>+2</sup> : 0.120; Mn <sup>+2</sup> : 0.02; Ni <sup>+2</sup> : 0.0064; Ni <sup>+2</sup> : 0.045; Fe <sup>+3</sup> : 0.0321; Al <sup>+3</sup> : 0.023, Cl <sup>-</sup> : 15.120, Br <sup>-</sup> : 2.984; SO <sub>4</sub> <sup>-2</sup> : 4.992; NO <sub>3</sub> <sup>-</sup> : 2.764; SeO <sub>3</sub> <sup>2-</sup> : 0.82; PO <sub>4</sub> <sup>-3</sup> : 5.231; SO <sub>3</sub> <sup>2-</sup> : 0.0750; CrO <sub>4</sub> <sup>-2</sup> : 0.086; NO <sub>2</sub> <sup>-</sup> : 0.120; F <sup>-</sup> : 0.0720; I <sup>-</sup> : 0.4329 | Found       | Uptake % |
| 20                                |                                                                                                                                                                                                                                                                                                                                                                                                                                                                                                                                                                                                                                                                                                                                                                                           | 18.74±0.013 | 93.7     |
| 200                               |                                                                                                                                                                                                                                                                                                                                                                                                                                                                                                                                                                                                                                                                                                                                                                                           | 190.4±0.04  | 95.2     |
| Lake water                        |                                                                                                                                                                                                                                                                                                                                                                                                                                                                                                                                                                                                                                                                                                                                                                                           |             |          |
| 20                                | Na <sup>+</sup> : 23.890; K <sup>+</sup> : 5.3; Mg <sup>+2</sup> : 4.9; Ca <sup>+2</sup> : 19.005; Li <sup>+</sup> : 0.035; Cl <sup>-</sup> : 15.120, Br <sup>-</sup> : 2.984; SO <sub>4</sub> <sup>-2</sup> : 4.992; NO <sub>3</sub> <sup>-</sup> : 2.764; SeO <sub>3</sub> <sup>2-</sup> : 0.82; PO <sub>4</sub> <sup>-3</sup> : 5.231; SO <sub>3</sub> <sup>2-</sup> : 0.0750; CrO <sub>4</sub> <sup>-2</sup> : 0.086; NO <sub>2</sub> <sup>-</sup> : 0.120; F <sup>-</sup> : 0.0720; I <sup>-</sup> : 0.4329; Sr <sup>+2</sup> : 0.014; Zn <sup>+2</sup> : 0.001; Pb <sup>+2</sup> : 0.005; Fe <sup>+2</sup> : 0.120; Mn <sup>+2</sup> : 0.02; Ni <sup>+2</sup> : 0.0064; Ni <sup>+2</sup> : 0.045; Fe <sup>+3</sup> : 0.0321; Al <sup>+3</sup> : 0.023,                              | 19.08±0.02  | 95.4     |
| 200                               |                                                                                                                                                                                                                                                                                                                                                                                                                                                                                                                                                                                                                                                                                                                                                                                           | 192.2±0.014 | 96.1     |
| Tap water                         |                                                                                                                                                                                                                                                                                                                                                                                                                                                                                                                                                                                                                                                                                                                                                                                           |             |          |
| 20                                | Mg <sup>+2</sup> : 1.95; Ca <sup>+2</sup> : 3.005; Na <sup>+</sup> : 15.520; K <sup>+</sup> : 0.597; Li <sup>+</sup> : 0.035; Sr <sup>+2</sup> : 0.001; Zn <sup>+2</sup> : 0.001; Pb <sup>+2</sup> : 0.0001; Fe <sup>+2</sup> : 0.001; Mn <sup>+2</sup> : 0.002; Ni <sup>+2</sup> : 0.0064; Ni <sup>+2</sup> : 0.009; Fe <sup>+3</sup> : 0.0021; Al <sup>+3</sup> : 0.009, Cl <sup>-</sup> : 12.120, Br <sup>-</sup> : 0.007; SO <sub>4</sub> <sup>-2</sup> : 0.992; NO <sub>3</sub> <sup>-</sup> : 0.007; PO <sub>4</sub> <sup>-3</sup> : 1.231; SO <sub>3</sub> <sup>2-</sup> : 0.0750; CrO <sub>4</sub> <sup>-2</sup> : 0.006; NO <sub>2</sub> <sup>-</sup> : 0.0020                                                                                                                   | 18.96±0.005 | 94.8     |



|     |  |             |      |
|-----|--|-------------|------|
| 200 |  | 193.6±0.021 | 96.8 |
|-----|--|-------------|------|

Three-types of competitive ions of minerals (mg/L), heavy metals (µg/L) and anions (µg/L). The underground and tap water samples were provided from Al-Kharj, and Riyadh, KSA. The lake water sample was provided from Tuskuba, Japan.

#### Supporting Information References:

- 1) B. Delley, J. Chem. Phys. **1990**, 92, 508.
- 2) B. Delley, J. Chem. Phys. **2000**, 113, 7756.
- 3) J.P. Perdew, K. Burke, M. Ernzerhof, Physical Review **Letters** **1996**, 77, 3865.
- 4) B. Delley, Phys. Rev. B **2002**, 66, 155125.
- 5) a) S.A. El-Safty, Y. Kiyozumi, T. Hanaoka, F. Muzukami, Appl. Catal. A: General. **2008**, 337, 121-129; b) M. Khairy, S.A. El-Safty, Curr. Catal., **2013**, 2, 17-26. c) S.A. El-Safty, Y. Kiyozumi, T. Hanaoka, F. Muzukami, Appl. Catal. B: Envir. **2008**, 82(3-4):169-179.
- 6) a) S. A. El-Safty, M. A. Shenashen, M. Khairy, M. Ismeal, Adv. Funct. Mater. **2012**, 22, 3013–3021. b) SA El-Safty, Y Kiyozumi, T Hanaoka, F Mizukami, J. Phys. Chem. C, **2008**, 112 (14), 5476-5489. c) S. A. El-Safty, F. Mizukami, T. Hanaoka, J. Phys. Chem. B. **2005**, 109 (19), 9255-9264.
- 7) a) M. Shenashen,, S. A. El-Safty, E. A. Elshehy, J. Hazard. Mater. ,**2013**, 260, 833– 843.b) S. A. EL-Safty, A. Abdellatef, M. Ismeal, A. Shahat, Adv. Healthcare Mater. ,**2013**, 2, 854- 862.c) M. Khairy, S.A. El\_Safty, M. Ismael, H. Kawarada, Appl. Catal. B: Envir., **2012**, 123– 124, 162– 173. d) M. Khairy, S. A. El\_Safty, M. Ismael, H. Kawarada, Appl. Catal. B: Envir., **2012**, 127, 1-10.
- 8) S.A. El-Safty, Y. Kiyozumi, T. Hanaoka, F. Muzukami, Appl. Catal. B: Envir. ,**2008**, 82(3-4):169-179.
- 9) S. Y. Kim, H. M. Jeong, J. H. Kwon, I. W. Ock, W. H. Suh, G. D. Stucky, J. K. Kang, Energy Environ. Sci., **2015**, 8(1), 188-194.
- 10) W. Liu, Y. Feng, X. Yan, J. Chen, Q. Xue, Adv. Funct. Mater.,**2013**, 23(33), 4111-4122.
- 11) a) C. Chang, C. Chang, K. Hsu, W. Höll, P. Chiang, Environ. Eng. Manage. , **2007**, 17(5), 311-318; b) J. A. Salam, A. Das, Inter. J. of Pharm. and Pharmaceut. Sci. ,**2013**, 5(3), 814-816.c) J. M. Salman, J. Chem. **2013**, 1-5. d) S. Dutta, S. N. Chaudhuri, 2012, 3, 107-111.
- 12) a) J. A. Lewis, J. Am. Ceram. Soc. **2000**, 83, 2341–2359. b) S. A. El-Safty, J. Colloids Interface Sci. ,**2003**, 260, 184-194.
- 13) a) A. Delle-Site, A review. J. Physical. Chem. **2001**, 30, 187-438. b) V. Addorisio, D. Pirozzi, S. Esposito, F. Sannino, J. Hazard. Mater. **2011**, 196, 242–247.

- 14) S. A. El-Safty, M. A. Shenashen, M. Khairy, M. Ismeal, *Adv. Funct. Mater.*, **2012**, 22, 3013–3021
- 15) a) A. Derbalah, S. A. El-Safty, M. A. Shenashen, N. El-Manakhly, *ChemPlusChem* 2015, DOI: cplu.201500098R1. b) G. Yang, Y. Zhao, X. Lu, X. Gao, *Physicochem. Eng. Aspects*, **2005**, 264, 179–186.
- 16) Horsfall, M. Spiff, A.I. Abia, A.A. Bull. Korean Chem. Soc., **2004**, 25, 969–976.
- 17) G. Javier, M. Maria, P. Joan de, R. Miquel, D. Lara, J. Hazard. Mater. **2007**, 141, 575–580
- 18) H. Matsunaga, T. Yokoyama, R.J. Eldridge, B.A. Bolto, *React. Funct. Polym.* **1996**, 29, 167–174.,
- 19) T. Balaji, T. Yokoyama, H. Matsunaga, *Chemosphere* **2005**, 59, 1169–1174
- 20) J.A. Munoz, A. Gonzalo, M. Valiente, *Environ. Sci. Technol.* **2002**, 36, 3405–3411.
- 21) G. Zhang, J. Qu, H. Liu, R. Liu, R. Wu, *Water research*, **2007**, 41, 1921–1928
- 22) Y. Yoon, W. K. Park, Tae-M. Hwang, D. H. Yoon, W. S. Yang, J-W. Kang, *Journal of Hazardous Materials* **2016**, 304, 196–204,
- 23) Y. Yoon, W. K. Park, Tae-M. Hwang, D. H. Yoon, W. S. Yang, J-W. Kang, *Journal of Hazardous Materials* **2016**, 304, 196–204,
- 24) B.K. Biswas, J.I. Inoue, K. Inoue, K.N. Ghimire, H. Harada, K. Ohto, H. Kawakita, *J. Hazard. Mater.* **2008**, 154, 1066–1074
- 25) I. Andjelkovic, D. N. H. Tran, S. Kabiri, S. Azari, M. Markovic, D. Losic, *ACS Appl. Mater. Interfaces* **2015**, 7, 9758–9766
- 26) J. Zhu, S. A. Baig, T. Sheng, Z. Lou, Z. Wang, X. Xu, *Journal of Hazardous Materials* **2015**, 286, 220–228
- 27) Z. Ren, G. Zhang, J. P. Chen, *Journal of Colloid and Interface Science* **2011**, 358, 230–237
- 28) G.S. Zhang, J.H. Qu, H.J. Liu, R.P. Liu, R.C. Wu, *Water Res.* **2007**, 41, 1921–1928.,
- 29) K. Gupta, U.C. Ghosh, *J. Hazard. Mater.* **2009**, 161, 884–892
- 30) K. Gupta, K. Biswas, U.C. Ghosh, *Ind. Eng. Chem. Res.* **2008**, 47, 9903–9912,
- 31) M.E. Pena, G.P. Korfiatis, M. Patel, L. Lippicott, X.G. Meng, *Water Res.* **2005**, 39, ( )2327–2337,
- 32) J. Hlavay, K. Polyák, *J. Colloid Interface Sci.* **2005**, 284, 71–77,
- 33) H. Zhu, Y. Jia, X. Wu, He Wang, *Journal of Hazardous Materials* **2009**, 172, 1591–1596
- 34) Carol A. Martinson, K.J. Reddy, *Journal of Colloid and Interface Science* **2009**, 336, 406–411
- 35) I. Andjelkovic, D. Stankovic, J. Nesic, J. Krstic, P. Vulic, D. Manojlovic,|| and G. Roglic, *Ind. Eng. Chem. Res.* **2014**, 53, 10841–10848
- 36) I. Andjelkovic, D. Stankovic, J. Nesic, J. Krstic, P. Vulic, D. Manojlovic,|| and G. Roglic, *Ind. Eng. Chem. Res.* **2014**, 53, 10841–10848
- 37) C-H. Liu, Y-H. Chuang, T-Y. Chen, Y. Tian, H. Li, M-K. Wang, W. Zhang, *Environ. Sci. Technol.* **2015**, 49, 7726–7734
- 38) S. A. Ntim, S. Mitra, *J. Chem. Eng. Data* **2011**, 56, 2077–2083
- 39) X-Y. Yu, R-X. Xu, C. Gao, T. Luo, Y. Jia, J-H. Liu, X-J. Huang, *ACS Appl. Mater. Interfaces* **2012**, 4, 1954–1962
- 40) A. M. Cao, J. D. Monnell, C. Matranga, J. M. Wu, L. L. Cao, D. J. Gao, *Phys. Chem. C* **2007**, 111, 18624.
- 41) T. S. Singh, K.K. Pant, *Separation and Purification Technology* **2004**, 36, 139–147
- 42) X. Luo, C. Wang, S. Luo, R. Dong, X. Tu, G. Zeng, *Chem. Eng. J.* **2012**, 187, 45–52.
